# Supplementary material for: Robust nanosheet-assembled Al2O3-supported Ni catalysts for the dry reforming of methane: the effect of nickel content on the catalytic performance and carbon formation
Source: Royal Society of Chemistry journal article supplement (doi:10.1039/d1nj03954g), 2021-01-01
Supplement: d1nj03954g1.pdf [file d1nj03954g1.pdf]

## Supporting Information

### **Robust nanosheet-assembled Al<sub>2</sub>O<sub>3</sub> supported Ni catalyst for dry reforming of methane: Effect of nickel content on catalytic performance and carbon formation**

Shuangshuang Zhang<sup>a</sup>, Tao Yang<sup>a</sup>, Jun Yu<sup>b,\*</sup>, Wangcheng Zhan<sup>a</sup>, Li Wang<sup>a</sup>, Yun Guo<sup>a</sup>, Yanglong Guo<sup>a,\*</sup>

<sup>a</sup> Key Laboratory for Advanced Materials, Research Institute of Industrial Catalysis, School of Chemistry and Molecular Engineering, East China University of Science and Technology, Shanghai 200237, P. R. China

<sup>b</sup> Research Institute of Applied Catalysis, School of Chemical and Environmental Engineering, Shanghai Institute of Technology, Shanghai 201418, P. R. China

\* Corresponding authors: yujun@sit.edu.cn (J. Yu), ylguo@ecust.edu.cn (Y.L. Guo)

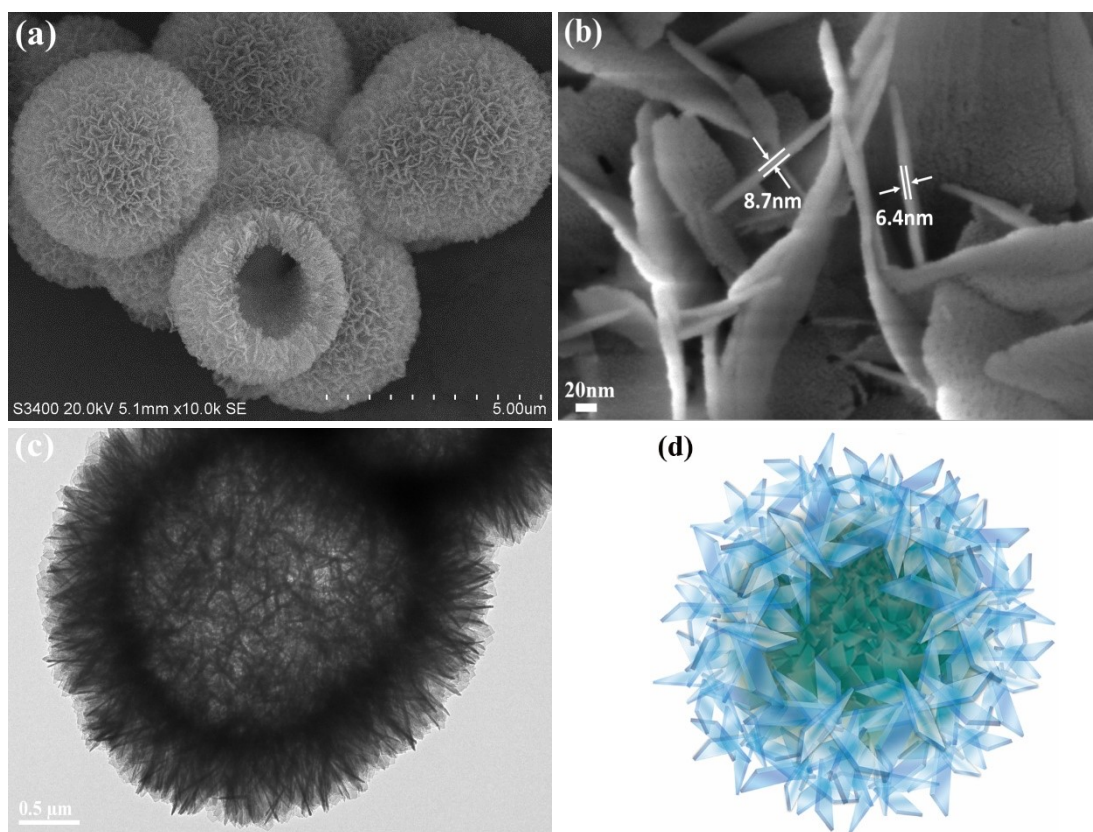

**Fig. S1** SEM (a), FESEM (b), TEM (c) and schematic image (d) of NA- $\text{Al}_2\text{O}_3$  support.

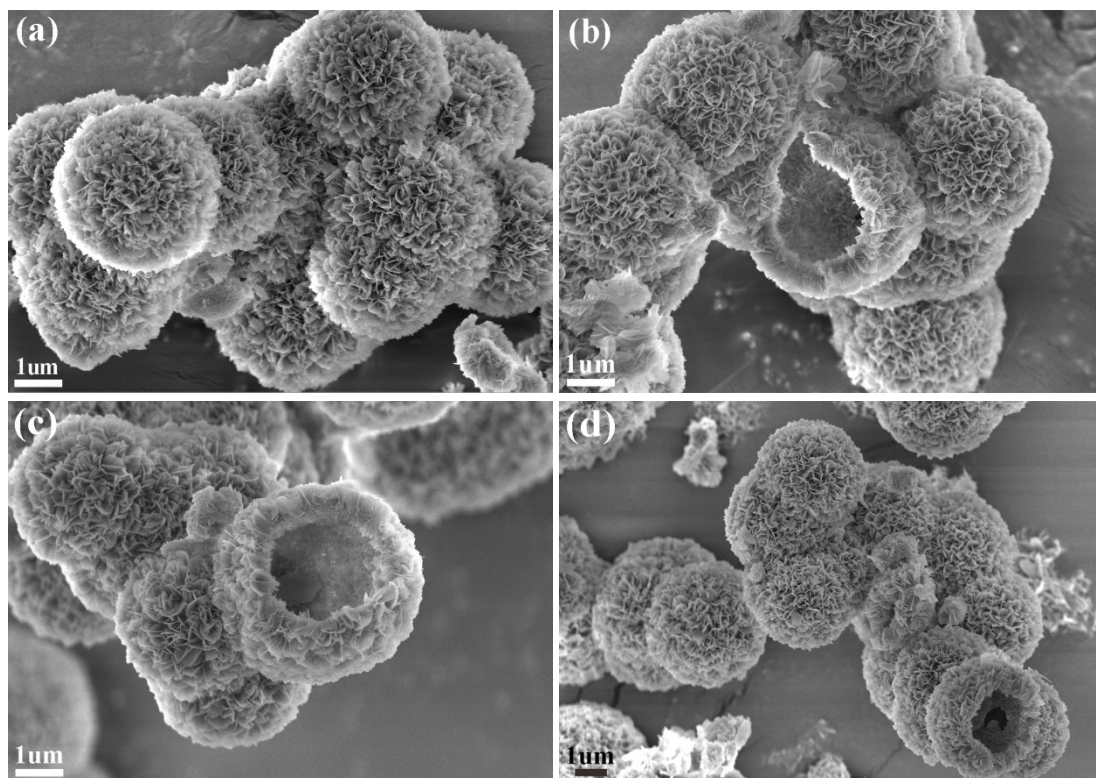

**Fig. S2** FESEM of calcined Ni/(NA-Al<sub>2</sub>O<sub>3</sub>) catalysts: (a) 3%-Ni/(NA-Al<sub>2</sub>O<sub>3</sub>); (b) 5%-Ni/(NA-Al<sub>2</sub>O<sub>3</sub>); (c) 10%-Ni/(NA-Al<sub>2</sub>O<sub>3</sub>); (d) 20%-Ni/(NA-Al<sub>2</sub>O<sub>3</sub>).

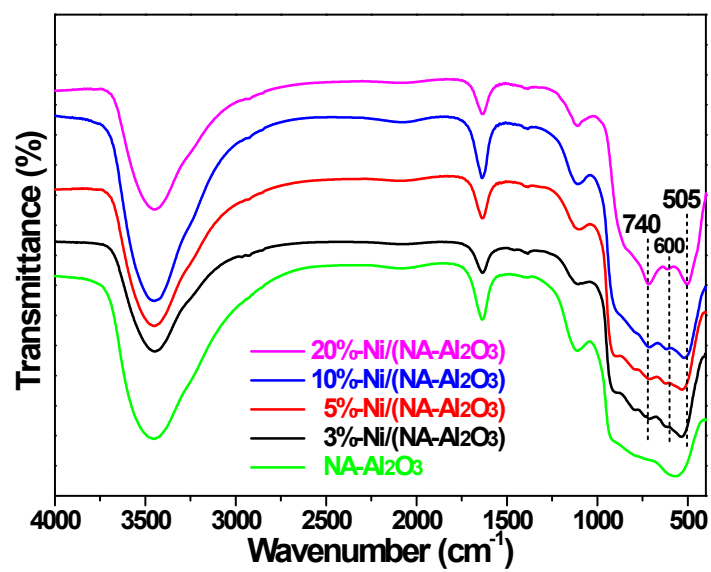

Fig. S3 FT-IR spectra of NA-Al<sub>2</sub>O<sub>3</sub> support and calcined Ni/(NA-Al<sub>2</sub>O<sub>3</sub>) catalysts.

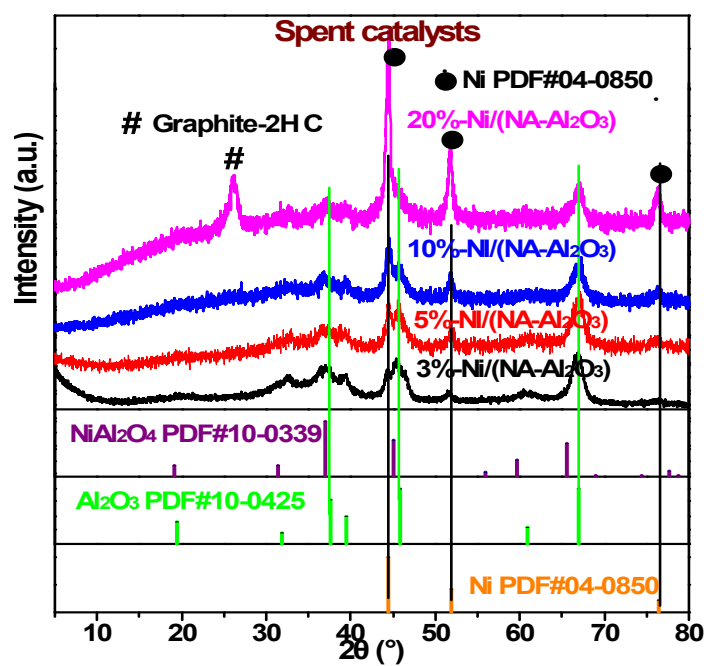

Fig. S4 XRD patterns of spent Ni/(NA-Al<sub>2</sub>O<sub>3</sub>) catalysts.

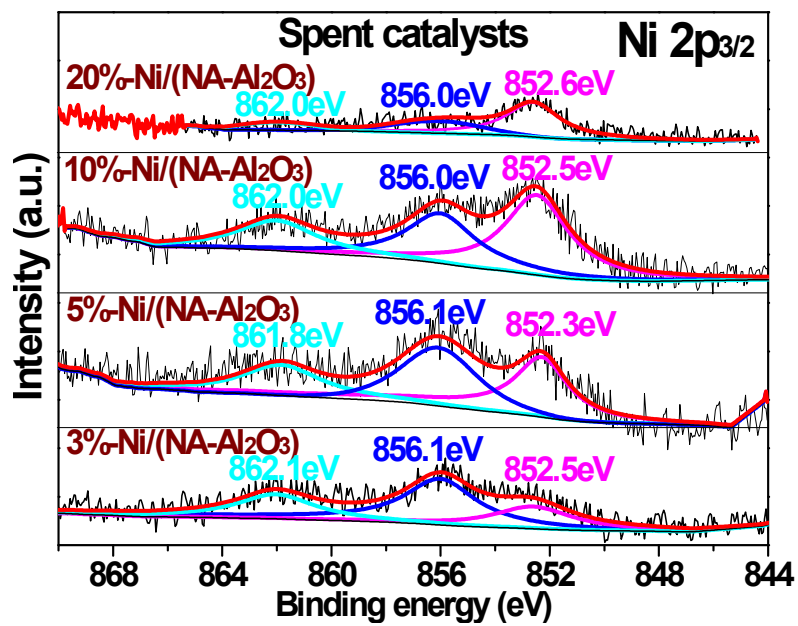

Fig. S5 XPS spectra of Ni 2p<sub>3/2</sub> region of spent Ni/(NA-Al<sub>2</sub>O<sub>3</sub>) catalysts.

**Table S1** Textural properties of NA-Al<sub>2</sub>O<sub>3</sub> support and Ni/(NA-Al<sub>2</sub>O<sub>3</sub>) catalysts with various Ni loadings.

| Catalysts                                   | $S_{\text{BET}}$ (m <sup>2</sup> /g) | Pore volume (cm <sup>3</sup> /g) | Mean pore diameter (nm) |
|---------------------------------------------|--------------------------------------|----------------------------------|-------------------------|
| NA-Al <sub>2</sub> O <sub>3</sub>           | 203.5                                | 0.73                             | 8.3                     |
| 3%-Ni/(NA-Al <sub>2</sub> O <sub>3</sub> )  | 129.9                                | 0.70                             | 19.7                    |
| 5%-Ni/(NA-Al <sub>2</sub> O <sub>3</sub> )  | 128.7                                | 0.69                             | 20.9                    |
| 10%-Ni/(NA-Al <sub>2</sub> O <sub>3</sub> ) | 123.3                                | 0.66                             | 23.9                    |
| 20%-Ni/(NA-Al <sub>2</sub> O <sub>3</sub> ) | 93.4                                 | 0.62                             | 25.4                    |

**Table S2** Ni crystallite size, Ni particle size and surface composition of the spent Ni/(NA-Al<sub>2</sub>O<sub>3</sub>) catalysts.

| Catalysts                                   | Ni crystallite size <sup>a</sup> | Ni particle size <sup>b</sup> | Ni particle           | Ni <sup>0</sup> /(Ni <sup>0</sup> +Ni <sup>2+</sup> ) <sup>d</sup> |
|---------------------------------------------|----------------------------------|-------------------------------|-----------------------|--------------------------------------------------------------------|
|                                             | (nm)                             | (nm)                          | size growth           |                                                                    |
|                                             | Spent                            | Spent                         | rate (%) <sup>c</sup> | Spent                                                              |
| 3%-Ni/(NA-Al <sub>2</sub> O <sub>3</sub> )  | 11.1                             | 11.6                          | 352                   | 0.31                                                               |
| 5%-Ni/(NA-Al <sub>2</sub> O <sub>3</sub> )  | 17.4                             | 18.2                          | 294                   | 0.51                                                               |
| 10%-Ni/(NA-Al <sub>2</sub> O <sub>3</sub> ) | 19.0                             | 20.1                          | 218                   | 0.59                                                               |
| 20%-Ni/(NA-Al <sub>2</sub> O <sub>3</sub> ) | 23.7                             | 24.3                          | 219                   | 0.72                                                               |

<sup>a</sup> Calculated from XRD patterns by Scherrer equation.

<sup>b</sup> Obtained from TEM images by making statistics of particle distribution.

<sup>c</sup> Obtained by dividing the Ni particle size of spent catalyst by Ni particle size of reduced catalyst obtained from TEM results.

<sup>d</sup> Surface element composition obtained from XPS results.
